# Supplementary material for: Glycoside Hydrolase Activities in Cell Walls of Sclerenchyma Cells in the Inflorescence Stems of Arabidopsis thaliana Visualized in Situ
Source: MDPI journal article supplement (doi:10.3390/plants3040513), 2014-11-12
Supplement: s1 [file s1]

## Supplementary Materials

1. Autofluorescence of cortical cells in *Arabidopsis* stem sections.
2. Time series *in situ*  $\beta$ -1,4-glucosidase activity (Glc- $\beta$ -Res) in the inflorescence stem of *Arabidopsis*
3. Time series *in situ*  $\beta$ -1,4-glucosidase and  $\beta$ -1,4-glucanase activities (Glc-Glc- $\beta$ -Res ) in the inflorescence stem of *Arabidopsis*
4. Time series *in situ*  $\beta$ -1,4-glucanase activity (Glc-S-Glc- $\beta$ -Res) in the inflorescence stem of *Arabidopsis*
5. Time series *in situ*  $\beta$ -1,4-galactosidase activity (Gal- $\beta$ -Res) in the inflorescence stem of *Arabidopsis*
6. Time series *in situ* xyloglucanase activity (XXXG- $\beta$ -Res) in the inflorescence stem of *Arabidopsis*
7. NMR data for resorufinyl 2,3,6-tri-*O*-acetyl-4-*S*-(2,3,4,6-tetra-*O*-acetyl- $\beta$ -D-glucopyranosyl)-4-thio- $\beta$ -D-glucopyranoside and resorufinyl 4-*S*-( $\beta$ -D-glucopyranosyl)-4-thio- $\beta$ -D-glucopyranoside (Glc-S-Glc- $\beta$ -Res).

© 2014 by the authors; licensee MDPI, Basel, Switzerland. This article is an open access article distributed under the terms and conditions of the Creative Commons Attribution license (<http://creativecommons.org/licenses/by/4.0/>).
