# Supplementary material for: Glycoside Hydrolase Activities in Cell Walls of Sclerenchyma Cells in the Inflorescence Stems of Arabidopsis thaliana Visualized in Situ
Source: MDPI journal article supplement (doi:10.3390/plants3040513), 2014-11-12
Supplement: s1 [file s1]

**Supplemental Material 1.** Autofluorescence of cortical cells in Arabidopsis stem sections. Micrographs show the transmitted light channel (A) and fluorescence seen in the resorufin channel (B).

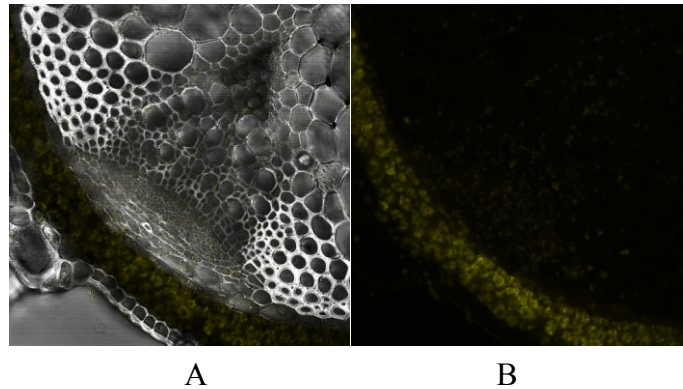

A

B

© 2014 by the authors; licensee MDPI, Basel, Switzerland. This article is an open access article distributed under the terms and conditions of the Creative Commons Attribution license (<http://creativecommons.org/licenses/by/4.0/>).
